# Supplementary material for: QTL analysis reveals quantitative resistant loci for Phytophthora infestans and Tecia solanivora in tetraploid potato (Solanum tuberosum L.)
Source: PLoS One. 2018 Jul 6;13(7):e0199716. doi: 10.1371/journal.pone.0199716 (PMC6034811; doi:10.1371/journal.pone.0199716)
Supplement: S1 Table — (XLSX) [file pone.0199716.s001.xlsx]

## Sheet: traits
Genotype	Trait
	rAUDPC-2015	IPC-2015	rAUDPC-2016	IPC-2016	IPA	SPA	OPA
1	0.198	31193	0.529	3382	38.12	63.71	2.96
2	0.172	16279	0.521	6279	21.60	42.73	1.61
3	0.219	17514	0.436	3938	35.99	66.48	3.51
4	0.140	9865	0.411	4142	25.95	72.46	1.59
5	0.225	48814	0.552	1535	52.18	56.84	1.16
6	0.191	33333	0.406	6294	44.78	51.49	2.34
7	0.102	48066	0.364	7968	44.35	53.21	2.09
8	0.183	9231	0.370	0.901	12.84	40.21	1.21
9	0.192	40234	0.492	1304	35.43	67.29	3.05
10	0.235	26087	-	-
11	0.158	12025	0.543	1074	38.45	53.71	1.81
12	0.127	8871	0.299	3389	13.31	52.65	1.97
13	0.142	37313	0.585	4601	18.91	39.96	1.34
14	0.168	15736	0.548	5655	14.22	38.24	1.23
15	0.139	30973	0.393	6351	22.69	34.20	1.27
16	0.148	27559	0.369	0.533	17.10	49.81	1.54
17	0.199	17300	0.404	15269	42.18	69.07	2.10
18	0.184	32000	0.461	6700	8.52	58.00	1.82
19	0.167	11060	0.181	2126	20.39	44.41	1.98
20	0.157	68807	0.554	12637	56.14	61.15	2.62
21	0.157	20606	-	-
22	0.171	21702	0.376	18127	12.40	27.83	1.61
23	0.153	55682	0.529	6635	31.23	38.71	1.36
24	0.126	13386	0.425	0.517	24.02	41.78	2.38
25	0.172	5177	-	1720	15.86	55.41	1.05
26	0.164	13462	0.157	9732	40.40	65.13	2.26
27	0.161	14428	0.205	2433		43.71
28	0.116	7483	0.487	3249	7.06	41.63	1.99
29	0.154	9821	0.543	0.981	5.07	40.86	0.89
30	0.091	19545	0.527	6412	38.87	60.15	3.79
31	0.196	26316	0.440	10973	29.97	49.89	1.81
32	0.165	46753	0.447	20528	36.23	39.70	1.66
33	0.165	28571	0.346	2752	15.08	32.57	1.09
34	0.228	47343	0.460	1432	33.44	55.25	2.66
35	0.152	46961	0.273	5867	33.79	50.33	2.12
36	0.115	41192	0.586	0.000	56.88	63.00	2.25
37	0.159	19200	0.198	0.877	16.23	56.44	1.39
38	0.123	71221	0.258	1790	21.43	56.21	2.08
39	0.077	32386	0.506	10232	15.73	52.64	1.62
40	0.177	8017	0.503	5289	47.81	50.86	2.93
41	0.156	3716	0.441	1279	24.21	24.38	1.26
42	0.172	-	0.496	3550	35.82	38.63	1.64
43	0.119	15909	0.288	9774	17.88	50.44	1.35
44	0.215	8000	0.532	3726	43.56	55.25	2.65
45	0.256	69828	0.430	5570	14.59	43.71	1.50
46	0.114	42857	-	-
47	0.140	25194	0.366	3252	17.24	34.46	1.17
48	0.176	0.741	0.399	7716	22.81	50.14	1.38
49	0.159	32787	0.349	3651	16.48	66.63	1.27
50	0.196	15625	0.577	2424	30.19	68.32	1.28
51	0.157	21053	0.422	1065	18.38	47.34	1.46
52	0.151	32075	0.458	0.000	34.78	30.16	1.10
53	0.193	46067	0.513	2871	55.15	56.89	1.59
54	0.118	31507	0.501	5149	31.37	59.04	1.93
55	0.078	45455	0.295	4145	28.56	40.03	3.07
56	0.230	8075	0.457	0.930	44.79	64.46	1.94
57	0.169	9917	0.348	2779	26.83	65.45	1.94
58	0.119	4846	0.415	3377	11.18	31.53	1.22
59	0.129	53684	0.276	5274	17.27	28.09	1.37
60	0.132	32653	0.436	0.766	29.74	43.42	2.32
61	0.115	26984	0.559	7807	46.43	55.71	3.78
62	0.200	11268	0.485	0.966	36.11	58.92	0.90
63	0.186	63333	0.363	4167	66.72	77.88	2.76
64	0.149	19412	0.348	13980	28.03	58.53	2.04
65	0.211	38462	0.408	6507	20.18	43.42	1.67
66	0.140	26471	0.327	4553	46.79	64.25	8.87
67	0.139	25778	0.589	6097	49.36	51.84	2.68
68	0.158	23810	0.400	7182	14.10	28.43	1.07
69	0.207	36318	0.367	1012	43.62	56.91	2.72
70	0.207	14925	0.402	2763	9.84	49.02	1.64
71	0.177	13750	0.450	4072	50.67	62.52	3.47
72	0.169	43925	0.480	8268	32.16	66.49	2.03
73	0.153	-	0.590	6001	14.00	41.98	1.41
74	0.248	73214	0.633	-
75	0.149	15267	0.473	2235	25.51	43.30	2.00
76	0.174	11881	0.722	2001	41.54	69.94	2.08
77	0.163	12752	0.662	2774	48.66	49.34	2.74
78	0.223	37143	0.526	33333	29.79		2.44
79	0.162	4255	-	-
80	0.201	27273	0.701	9164	29.21	57.17	1.31
81	0.155	21961	0.163	6393	36.66	53.58	2.89
82	0.200	27826	0.345	0.833	21.58	44.68	1.00
83	0.151	50000	-	-
84	0.113	31361	0.295	7725	12.43	37.46	1.45
85	0.244	55026	0.470	6073	23.07	54.34	1.06
86	0.134	15741	0.398	9774	27.19	61.54	2.01
87	0.210	-	0.597	6513	46.68	56.27	1.96
88	0.143	47351	0.515	3851	44.75	64.77	1.37
89	0.139	26316	0.449	5246	34.04	46.66	1.41
90	0.126	24675	0.356	2136	20.74	39.84	1.71
91	0.172	16908	0.492	3136	34.72	50.84	1.71
92	0.141	30909	0.378	4916	17.97	52.01	1.65
93	0.173	36464	0.294	2045	59.27	81.84	4.64
94	0.114	2609	0.218	2365	26.85	45.71	2.15
Pastusa Suprema	-	-	0.274	9990	11.45	29.32	2.99
Diacol Capiro	0.187	54178	0.577	4720	36.92	53.61	2.45
Average	0.16	27.53	0.43	5.22	29.93	51.28	2.00
SD	0.04	17.14	0.12	4.94	13.88	12.05	1.04
Min	0.08	0.74	0.16	0.00	5.07	24.38	0.89
Max	0.26	73.21	0.72	33.33	66.72	81.84	8.87

## Sheet: map
Crh_1
c1_5656_chr01	0	2211	1111	2	0
c2_17185_chr01	0.57	2112	1122	2	2
c1_5762_chr01	1.57	1211	1212	1	2
c2_12093_chr01	2.39	1121	1212	1	2
c2_12094_chr01	2.66	2211	1212	2	2
c2_12125_chr01	3.59	1221	2111	2	1
c2_17539_chr01	3.94	1121	1211	1	1
c1_3901_chr01	4.07	2111	1122	1	2
c2_17156_chr01	4.46	1111	2111	0	1
c1_9587_chr01	5.63	1221	2111	2	1
c2_17204_chr01	5.63	1111	1122	0	2
c2_31820_chr01	5.73	1221	2111	2	1
c1_3868_chr01	5.95	1111	1121	0	1
c2_12098_chr01	5.96	1111	1121	0	1
c2_31850_chr01	6.05	1111	1121	0	1
c1_9573_chr01	6.05	1111	1121	0	1
c2_31803_chr01	6.08	1111	1121	0	1
c2_19958_chr01	6.22	1221	2112	2	2
c2_51055_chr01	6.43	1121	1111	1	0
c2_12204_chr01	6.94	2111	1222	1	3
c1_6278_chr01	6.99	1122	2121	2	2
c1_3867_chr01	7.25	2111	1121	1	1
c1_9567_chr01	7.26	1111	1221	0	2
c2_12116_chr01	7.38	2111	1111	1	0
c2_12215_chr01	7.49	2111	1112	1	1
c1_3844_chr01	8.27	1111	1212	0	2
c2_31857_chr01	8.34	1111	1211	0	1
c2_20028_chr01	8.5	1111	1211	0	1
c2_17374_chr01	8.55	1111	1211	0	1
c2_12210_chr01	8.55	1111	1221	0	2
c2_12217_chr01	8.57	1222	2111	3	1
c1_5286_chr01	8.83	1212	1211	2	1
c1_14089_chr01	9.43	1221	2111	2	1
c2_9925_chr01	9.67	1211	2111	1	1
c2_12157_chr01	9.81	2111	1111	1	0
c1_5306_chr01	10.09	1112	1211	1	1
c2_53366_chr01	10.66	2111	1112	1	1
c1_6294_chr01	11.34	2111	1112	1	1
c2_20003_chr01	12.1	1111	1112	0	1
c2_16435_chr01	12.12	1212	1212	2	2
c2_53370_chr01	12.52	1221	1221	2	2
c2_20506_chr01	13.05	1211	1112	1	1
c2_20032_chr01	13.37	1111	1112	0	1
c1_5254_chr01	13.39	2211	1122	2	2
c2_20010_chr01	13.51	1111	1112	0	1
c1_2515_chr01	15.01	2111	1111	1	0
c2_14333_chr01	16.01	1111	1121	0	1
c2_7061_chr01	16.07	2111	1122	1	2
c2_14283_chr01	17.39	1122	2111	2	1
c1_5346_chr01	17.72	1111	1221	0	2
c2_2509_chr01	17.93	2111	2111	3	1
c2_20514_chr01	19.07	1211	2211	1	2
c1_5295_chr01	19.2	2111	1221	1	2
c2_2215_chr01	20.26	1111	1121	0	1
c1_4625_chr01	20.54	1121	2121	1	2
c1_4748_chr01	20.66	1221	2111	2	1
c1_5150_chr01	22.21	1122	1122	2	2
c2_14613_chr01	22.47	2211	1211	2	1
c1_4757_chr01	24.67	1222	2111	3	1
c2_54817_chr01	26.19	2121	1122	2	2
c2_6760_chr01	33.53	1111	1121	0	1
c2_6779_chr01	34.18	2111	1112	1	1
c2_6767_chr01	34.68	2121	1221	2	2
c1_6083_chr01	35.01	1122	2111	2	1
c2_54797	35.35	1111	2121	0	2
c1_6704_chr01	35.52	2211	2211	2	2
c2_36640_chr01	36.09	1111	2111	0	1
c1_10915_chr01	36.53	1111	2111	0	1
c2_21090_chr01	37.74	1111	2111	0	1
c1_6122_chr01	38.12	1122	2121	2	2
c2_36659_chr01	39.62	2111	2111	1	1
c2_36664_chr01	39.74	2111	2111	1	1
c1_6114_chr01	40.41	1121	1212	1	2
c2_19396_chr01	41.34	1121	1111	1	0
c2_19251_chr01	42.07	1211	1111	1	0
c2_51810_chr01	44.3	1121	1112	1	1
c2_51800_chr01	45.21	2121	1211	2	1
c2_55012_chr01	46.62	1211	1111	1	0
c2_48054_chr01	49.07	1221	1111	2	0
c1_13279_chr01	50.75	2111	1211	1	1
c2_48060_chr01	51.65	1121	1111	1	0
c2_53841_chr01	53.31	1121	2211	1	2
c2_45064_chr01	53.37	1121	1111	1	0
c2_27896_chr01	53.82	2211	2111	2	1
c2_27897_chr01	54.15	2111	2121	1	2
c2_27887_chr01	54.52	2111	1121	1	1
c2_45070_chr01	54.74	1111	2111	0	1
c2_45044_chr01	55.06	1111	2111	0	1
c2_52715	55.9	1211	1111	1	0
c2_27882_chr01	55.99	1121	1111	1	0
c2_45043_chr01	56.65	1121	2111	1	1
c2_53842_chr01	58.49	1111	2111	0	1
c2_39572	58.89	1112	1211	1	1
c2_50013_chr01	59.19	1111	2111	0	1
c2_52705	60.48	2111	1122	1	2
c2_2332	60.96	2111	1121	1	1
c2_52709	61.15	2121	1112	2	1
c2_2333	61.49	2211	2211	2	2
c1_15241	61.51	1111	2111	0	1
c1_14731_chr01	63.43	1111	2111	0	1
c2_49044_chr01	64.66	2111	1112	1	1
c1_14648_chr01	65.01	1111	2111	0	1
c2_49031_chr01	65.01	2111	2122	1	3
c2_40105_chr01	65.58	1211	2111	1	1
c2_54355_chr01	65.77	1111	2111	0	1
c2_27840_chr01	66.61	1111	2111	0	1
c2_24677_chr01	66.88	1121	2111	1	1
c1_12926_chr01	66.91	1111	2111	0	1
c2_50023_chr01	66.94	2211	2121	2	2
c2_43978_chr01	67	1111	2111	0	1
c2_2873_chr01	67.04	1221	2211	2	2
c2_2719_chr01	67.07	1211	1211	1	1
c2_43973_chr01	67.33	1111	2111	0	1
c2_686_chr01	67.59	1211	2112	1	2
c1_16423_chr01	68.05	1221	2211	2	2
c2_34938_chr01	68.15	2112	1122	2	2
c1_15714_chr01	68.18	2112	1122	2	2
c2_48538_chr01	68.21	1121	2111	1	1
c2_35220_chr01	68.39	2211	2111	2	1
c2_43645_chr01	68.56	1222	1112	3	1
c2_32110_chr01	68.62	2112	1121	2	1
c2_54480_chr01	68.67	1111	2111	0	1
c1_11872_chr01	68.78	1211	1111	1	0
c2_48563_chr01	68.85	1111	2111	0	1
c1_15793_chr01	69.05	1111	2111	0	1
c1_14955_chr01	69.14	1212	1122	2	2
c2_54811_chr01	69.18	1121	2211	1	2
c2_27677_chr01	69.57	1211	1111	1	0
c2_24678_chr01	69.73	1211	2111	1	1
c2_27683_chr01	69.76	1211	1111	1	0
c2_45395_chr01	69.77	1211	1111	1	0
c2_46234_chr01	69.95	1111	2111	0	1
c1_13822_chr01	70.04	1111	2111	0	1
c2_51033_chr01	70.34	2111	1121	1	1
c1_14219_chr01	72.29	1221	2211	2	2
c2_48166_chr01	73.44	1111	2111	0	1
c2_45301_chr01	77.3	2211	1212	2	2
c2_2637_chr01	77.72	2111	1212	1	2
c1_16040_chr01	78.27	2112	1122	2	2
c2_20799_chr01	81.69	1122	1122	2	2
c2_20798_chr01	81.69	2211	2211	2	2
c1_9386_chr01	82.42	2211	2111	2	1
c2_42946_chr01	83.54	2112	1112	2	1
c2_38417_chr01	84.55	1121	1111	1	0
c1_4298_chr01	84.58	1211	2111	1	1
c1_4799_chr01	84.75	2211	2111	2	1
c2_32350_chr01	85.7	1121	1211	1	1
c2_53079_chr01	86.21	2111	1111	1	0
c2_49910_chr01	86.86	1211	1112	1	1
c2_42943_chr01	86.9	2111	1111	1	0
c1_9430_chr01	86.99	2111	1111	1	0
c1_9428_chr01	87.08	2111	1111	1	0
c2_37794_chr01	89.11	1121	1111	1	0
c2_41951_chr01	89.94	1212	2211	2	2
c2_4943_chr01	90.23	1121	2111	1	1
c2_4647_chr01	90.71	1121	2111	1	1
c2_32346_chr01	91.91	1211	2221	1	3
c2_4906_chr01	92.32	2111	1121	1	1
c2_41336_chr01	92.46	1211	2111	1	1
c2_46207_chr01	93.92	1221	2211	2	2
c2_14474_chr01	94.16	1111	2111	0	1
c1_9676_chr01	94.29	1211	1111	1	0
c2_36562_chr01	94.79	2111	1111	1	0
c2_47366_chr01	95.24	1111	1211	0	1
c2_6997_chr01	95.49	2211	1111	2	0
c2_36548_chr01	95.56	1121	1111	1	0
c2_25_chr01	95.75	1111	1112	0	1
c2_53448_chr01	96.68	1111	1211	0	1
c2_4843_chr01	97	2111	1111	1	0
c2_16033_chr01	97.29	1211	2122	1	3
c1_659_chr01	97.38	2111	1212	1	2
c1_4763_chr01	97.6	1211	2111	1	1
c2_9908_chr01	97.77	1121	2111	1	1
c2_7002_chr01	97.92	1112	2121	1	2
c2_9878_chr01	97.98	1121	2111	1	1
c2_4835_chr01	98.06	1111	1212	0	2
c1_14055_chr01	98.82	1121	1211	1	1
c2_6990_chr01	100.21	2111	1111	1	0
c2_4926_chr01	100.37	2211	1111	2	0
c2_9808_chr01	100.53	2211	2111	2	1
c2_6995_chr01	100.73	1121	1222	1	3
c2_9791_chr01	100.76	2211	2112	2	2
c2_9947_chr01	100.87	1112	2111	1	1
c2_9930_chr01	101.67	1211	1221	1	2
c2_37574_chr01	101.71	1122	2111	2	1
c1_2475_chr01	102.34	2211	2111	2	1
c1_2466_chr01	102.4	1111	1211	0	1
c2_14492_chr01	102.76	1122	1111	2	0
c1_15123_chr01	102.81	1211	1211	1	1
c2_7094_chr01	103.16	1122	2111	2	1
c2_4844_chr01	105.46	1122	2111	2	1
c2_5078_chr01	105.53	1122	1212	2	2
c2_2352_chr01	106.15	1111	1211	0	1
c1_15872_chr01	106.18	1111	1211	0	1
c2_2273_chr01	106.56	1221	1212	2	2
c2_9970_chr01	107.12	1221	1111	2	0
c1_14044_chr01	108.3	1221	2111	2	1
Crh_2
c2_15215_chr02	0	1221	1211	2	1
c1_7869_chr02	2.27	1122	2111	2	1
c2_35702_chr02	2.82	1111	2111	0	1
c1_7873_chr02	2.84	1111	2111	0	1
c1_7874_chr02	2.87	1111	2111	0	1
c2_43408_chr02	6.13	2111	1211	1	1
c2_15047_chr02	6.2	2112	1211	2	1
c1_15746_chr02	13.38	1111	1121	0	1
c2_7391_chr02	17.77	1121	2112	1	2
c2_7423_chr02	17.99	2111	1221	1	2
c2_7422_chr02	17.99	2111	1221	1	2
c2_7424_chr02	17.99	2111	1221	1	2
c1_2563_chr02	19.26	1112	1111	1	0
c2_14986_chr02	20.67	2112	1211	2	1
c2_7457_chr02	20.89	2112	1212	2	2
c2_42166_chr02	22.04	1111	1121	0	1
c2_7559_chr02	24.83	1211	1111	1	0
c2_7356_chr02	24.87	1121	1111	1	0
c2_40610_chr02	28.15	1211	1111	1	0
c2_42132_chr02	28.55	2112	1121	2	1
c2_42133_chr02	28.55	2112	1121	2	1
c1_10491_chr02	28.7	2111	1111	1	0
c2_17921_chr02	29.33	2112	1121	2	1
c1_12375_chr02	29.44	2111	1111	1	0
c1_16171_chr02	29.47	2111	1111	1	0
c2_40172_chr02	30.05	2111	2121	1	2
c1_8127_chr02	30.18	1111	1211	0	1
c1_7915_chr02	30.27	1111	1211	0	1
c1_5837_chr02	30.62	1111	2111	0	1
c2_42265_chr02	30.91	1111	2111	0	1
c2_40169_chr02	31.03	1211	1211	1	1
c2_7565_chr02	31.54	2112	1111	2	0
c1_10494_chr02	31.7	1122	2111	2	1
c1_12373_chr02	32.08	1222	2111	3	1
c2_17887_chr02	32.4	1111	1211	0	1
c1_11581_chr02	32.65	2111	1111	1	0
c1_15481_chr02	32.65	2112	1111	2	0
c1_13233_chr02	32.69	2111	1111	1	0
c2_55204_chr02	32.93	2211	1111	2	0
c2_23192_chr02	33.56	2111	1111	1	0
c2_17896_chr02	33.71	2112	1221	2	2
c2_23178_chr02	34.59	2111	1111	1	0
c1_16172_chr02	35.35	1212	2121	2	2
c1_7439_chr02	36.46	2111	1111	1	0
c2_534_chr02	36.47	2111	1111	1	0
c2_46904_chr02	36.47	2111	1111	1	0
c2_46887_chr02	36.65	2111	1111	1	0
c1_7412_chr02	36.99	2111	1221	1	2
c1_14293_chr02	37.87	2111	1111	1	0
c2_13035_chr02	38.45	1111	1211	0	1
c2_33188_chr02	39.23	1122	2121	2	2
c2_15789_chr02	39.65	2111	2221	1	3
c1_13929_chr02	40.41	2111	1211	1	1
c2_54732_chr02	43.22	1111	1121	0	1
c2_23170_chr02	44.11	2112	1121	2	1
c1_13913_chr02	45.01	1111	1121	0	1
c1_14983_chr02	45.05	1111	1121	0	1
c2_39135_chr02	45.5	1111	1121	0	1
c1_7430_chr02	45.5	1212	1212	2	2
c2_11584_chr02	47.54	2111	1112	1	1
c2_47096_chr02	48.3	2122	2111	3	1
c2_2947_chr02	48.3	2122	2111	3	1
c2_32242_chr02	48.54	1111	1211	0	1
c2_41108_chr02	50.86	1211	1222	1	3
c2_32381_chr02	52.65	1221	1111	2	0
c2_17387_chr02	53.1	2111	1112	1	1
c1_9731_chr02	53.57	1221	1111	2	0
c2_38932_chr02	54.29	1211	1111	1	0
c1_12310_chr02	54.47	1211	1111	1	0
c2_38939_chr02	55.36	1211	2111	1	1
c2_46907_chr02	56.17	1111	2111	0	1
c2_41122_chr02	56.17	1211	1111	1	0
c2_41120_chr02	56.2	1211	1111	1	0
c2_38936_chr02	57.52	2112	1211	2	1
c2_2940_chr02	58.03	2111	1111	1	0
c2_750_chr02	58.6	2111	1111	1	0
c2_796_chr02	58.62	2111	1111	1	0
c2_16324_chr02	58.65	2111	1111	1	0
c1_15873_chr02	58.87	1211	1111	1	0
c2_4347_chr02	59.47	1211	1111	1	0
c1_4792_chr02	59.52	1211	1111	1	0
c1_16405_chr02	59.83	2111	1111	1	0
c2_48735_chr02	59.83	2111	1111	1	0
c2_4360_chr02	59.86	2111	1111	1	0
c2_4515_chr02	60.43	2111	1111	1	0
c2_45380_chr02	60.75	1111	1211	0	1
c2_38723_chr02	63.34	1111	1211	0	1
c2_45307_chr02	64.29	1121	1122	1	2
c2_45316_chr02	64.32	1211	2111	1	1
c2_45311_chr02	64.48	1221	2112	2	2
c1_9363_chr02	68.22	1211	2111	1	1
c2_39671_chr02	68.33	1211	1111	1	0
c1_16708	69.6	1111	1211	0	1
c2_37254_chr02	69.82	1111	2111	0	1
c2_21746_chr02	70.2	1211	1111	1	0
Crh_3
c1_12825_chr03	0	2111	1121	1	1
c2_36264_chr03	0.04	1121	2121	1	2
c1_12821_chr03	3.6	2111	1111	1	0
c2_52837_chr03	4.92	2211	1111	2	0
c1_15336_chr03	7.03	2111	2211	1	2
c1_11167_chr03	7.58	1121	1111	1	0
c1_5689_chr03	8.08	1111	1121	0	1
c1_10740_chr03	9.96	1111	2111	0	1
c2_1933_chr03	10.77	2211	1111	2	0
c1_11179_chr03	10.79	2211	1111	2	0
c2_46836_chr03	10.8	1111	1211	0	1
c1_11202	10.83	2211	1111	2	0
c1_450_chr03	10.96	2211	1111	2	0
c2_52838_chr03	11.45	2211	1211	2	1
c2_5263_chr03	12.9	2211	1111	2	0
c2_16679_chr03	13.03	1111	1121	0	1
c1_10726_chr03	13.37	2211	1111	2	0
c1_11842_chr03	13.49	1222	2111	3	1
c2_51091_chr03	13.91	2111	1111	1	0
c2_51095_chr03	13.93	2111	1111	1	0
c2_5261_chr03	14.52	1111	1211	0	1
c2_43267_chr03	14.59	2111	1111	1	0
c2_5238_chr03	15.27	2211	1111	2	0
c1_1918_chr03	15.49	2211	1211	2	1
c2_41066_chr03	15.62	1121	1122	1	2
c2_41056_chr03	16.59	2111	1111	1	0
c2_41163_chr03	16.62	2111	1211	1	1
c2_49739_chr03	16.64	2111	1111	1	0
c2_30708_chr03	17.18	1111	1121	0	1
c2_43260_chr03	17.56	1211	1111	1	0
c2_30682_chr03	19.47	1111	2211	0	2
c2_48381_chr03	19.49	2111	1112	1	1
c1_15342_chr03	19.71	2112	1111	1	0
c1_12751	19.88	1112	1111	1	0
c2_48370_chr03	21.3	1212	1122	2	2
c2_48369_chr03	21.3	2121	2211	2	2
c2_35234	21.68	1111	2111	0	1
c2_30741_chr03	22.85	2211	1111	2	0
c1_15926	22.96	1121	1111	1	0
c2_35358_chr03	23.19	2111	1111	1	0
c1_6850_chr03	23.39	1111	2111	0	1
c2_48389_chr03	24.09	1111	2111	0	1
c2_48385_chr03	24.85	2111	1111	1	0
c1_6875_chr03	28.57	2211	2211	2	2
c1_6869_chr03	29.69	1122	1121	2	1
c1_6853_chr03	30.98	1122	1121	2	1
c2_57354	31.2	2111	1111	1	0
c2_13821_chr03	32.97	1122	2112	2	2
c2_45699_chr03	34.44	2111	1121	1	1
c2_11224_chr03	34.48	1111	1211	0	1
c2_20309_chr03	35.18	2111	1121	1	1
c2_20324_chr03	36.87	2111	2111	1	1
c2_55279_chr03	37.18	2111	1121	1	1
c1_4444_chr03	37.95	1211	1111	1	0
c2_45700_chr03	38.53	2211	1111	2	0
c1_9141_chr03	38.68	1121	2111	1	1
c1_6352_chr03	38.87	2111	1111	1	0
c2_20428_chr03	40.25	2111	1111	1	0
c2_55284_chr03	40.6	2111	1111	1	0
c2_17559_chr03	40.68	2211	1111	2	0
c2_20433_chr03	40.71	2111	1111	1	0
c2_55276_chr03	40.78	2211	2111	2	1
c2_2137_chr03	42.5	2111	1111	1	0
c1_4542_chr03	44.38	2111	2111	1	1
c1_8997_chr03	45	2111	1211	1	1
c1_5799_chr03	47.21	1111	2111	0	1
c2_1616_chr03	47.68	2111	1111	1	0
c2_20124_chr03	47.68	2111	1111	1	0
c2_20284_chr03	47.91	2112	2111	2	1
c2_1533_chr03	49.52	2211	2111	2	1
c2_1791_chr03	51.37	2211	1212	2	2
c2_22456_chr03	52.68	2112	2211	2	2
c2_26382_chr03	53.15	1111	2111	0	1
c1_16513	53.48	1111	1211	0	1
c2_20177_chr03	53.73	1121	1111	1	0
c1_4509_chr03	53.81	1211	2112	1	2
c2_397_chr03	54.86	1111	2111	0	1
c2_57257	55.19	1211	1121	1	1
c2_18457_chr03	55.37	2111	2211	1	2
c2_328_chr03	56.59	1111	2111	0	1
c2_18429_chr03	57.22	1211	1111	1	0
c1_14163_chr03	57.23	1211	1111	1	0
c1_5955_chr03	57.23	1211	1111	1	0
c1_15547_chr03	57.87	2111	2211	1	2
c1_14159_chr03	60.37	1121	2112	1	2
c1_52_chr03	63.21	2121	2112	2	2
c2_92_chr03	63.61	2121	2111	2	1
c2_85_chr03	63.61	2121	2112	2	2
c1_42_chr03	63.61	2121	2112	2	2
c2_196_chr03	65.87	1121	2112	1	2
c2_262_chr03	66.53	1221	1221	2	2
c2_37146_chr03	67.38	1111	1211	0	1
c2_229_chr03	68.09	1111	2111	0	1
c2_325_chr03	69.13	1221	2112	2	2
c2_323_chr03	71.65	2111	1212	1	2
c2_400_chr03	71.77	2111	1111	1	0
c2_245_chr03	72.02	2111	1111	1	0
c2_158_chr03	73.11	2111	1111	1	0
c2_113_chr03	73.22	2111	1111	1	0
c1_26_chr03	79.34	2111	1111	1	0
c2_9580_chr03	79.8	1112	1111	1	0
c2_599_chr03	80.69	2111	2111	1	1
c2_9582_chr03	83.45	2111	1111	1	0
c2_55677_chr03	83.85	2111	1111	1	0
c2_55664_chr03	83.86	2111	1111	1	0
c1_3193_chr03	86.09	2111	1111	1	0
c2_9600_chr03	86.18	2111	1111	1	0
c2_9627_chr03	88.08	2112	1111	2	0
Crh_4
c1_3484_chr04	0	1211	2112	1	2
c2_10661_chr04	0.96	1211	2112	1	2
c2_10658_chr04	1	2111	2112	1	2
c1_10679_chr04	4.17	1121	1111	1	0
c2_10798_chr04	4.69	1212	1212	2	1
c1_3544_chr04	4.76	1211	1111	1	0
c2_10820_chr04	4.85	1211	1111	1	0
c1_10711_chr04	5.89	2121	1111	2	0
c2_35944_chr04	6.4	1212	1212	2	1
c2_10681_chr04	6.76	1111	2111	0	1
c1_10670_chr04	6.94	1211	2212	1	3
c2_10867_chr04	7.01	2111	2211	1	2
c2_10828_chr04	7.52	2211	2112	2	2
c1_10666_chr04	7.54	2121	2211	2	2
c1_3495_chr04	9.21	1111	1211	0	1
c2_10687_chr04	9.21	1111	1211	0	1
c1_3514_chr04	9.23	1111	1211	0	1
c2_10660_chr04	9.25	1111	1211	0	1
c2_35996_chr04	9.91	2111	1221	1	2
c1_10181_chr04	10.01	1111	2111	0	1
c2_12930_chr04	11.51	2111	1211	1	1
c2_12913_chr04	11.88	1111	2111	0	1
c1_10211_chr04	12.14	1111	1211	0	1
c2_52202_chr04	12.17	2111	1111	1	0
c1_4140_chr04	12.36	1221	1212	2	2
c1_10428_chr04	13.23	1111	2111	0	1
c2_12953_chr04	14.3	1221	2112	2	2
c2_34913_chr04	14.39	1221	2112	2	2
c2_34873_chr04	15.02	1221	1112	2	1
c1_10424_chr04	15.04	1221	1112	2	1
c2_34862_chr04	15.04	1221	1112	2	1
c2_25283_chr04	15.13	2111	1111	1	0
c2_26757_chr04	15.99	2111	1111	1	0
c2_32042_chr04	16.29	1211	1111	1	0
c1_16191_chr04	16.9	2111	1112	1	1
c2_55784_chr04	18.11	1211	2111	1	3
c2_55773_chr04	19.5	1211	1121	1	1
c2_55774_chr04	19.99	1211	1121	1	1
c2_39447_chr04	20.77	2111	1111	1	0
c1_8328_chr04	21.42	1211	2111	1	1
c2_26731_chr04	21.51	2111	2111	1	1
c2_32601_chr04	21.65	1211	1111	1	0
c2_39343_chr04	21.79	1211	1111	1	0
c2_21578_chr04	23.25	2111	2111	1	2
c2_43743_chr04	23.92	1211	2111	1	1
c1_11211_chr04	24.33	1122	1221	2	2
c2_38556_chr04	25.38	1221	1211	2	1
c2_43735_chr04	25.88	1221	1121	2	1
c2_51249_chr04	26.18	1111	1112	0	1
c1_11758_chr04	26.97	1111	1112	0	1
c2_55854_chr04	28.24	1111	2111	0	1
c2_32592_chr04	28.24	1211	1121	1	1
c1_11352_chr04	28.27	1211	2112	1	2
c2_36061_chr04	28.82	1111	2111	0	1
c1_12945_chr04	30.87	2121	2211	2	2
c2_34948_chr04	31.9	2111	1111	1	0
c1_11750_chr04	32.74	2211	1112	2	1
c2_36037_chr04	32.74	2111	1211	1	1
c1_10762_chr04	32.84	2111	1211	1	1
c1_15495_chr04	33.74	2111	1111	1	0
c2_52893_chr04	34.2	2111	1211	1	1
c1_15012_chr04	34.3	1122	1221	2	2
c2_52884_chr04	34.75	2111	1211	1	1
c1_10196_chr04	35.54	1221	2111	2	1
c1_10751_chr04	36.35	2111	2112	1	2
c2_54887_chr04	36.54	1111	2111	0	1
c2_48808_chr04	37.38	1121	1221	1	2
c2_21973_chr04	39.39	2112	1211	2	1
c2_21885_chr04	41.37	2111	1111	1	0
c2_45040_chr04	43.56	1211	2111	1	1
c1_14442_chr04	44.79	1211	1211	1	1
c2_1508_chr04	45.05	1211	2111	1	1
c1_14397_chr04	45.47	1211	2111	1	1
c2_48691_chr04	45.58	1211	2111	1	1
c2_7774_chr04	46.17	1111	1112	0	1
c2_10007_chr04	46.28	1111	1112	0	1
c2_7773_chr04	46.5	1111	1112	0	1
c2_53509_chr04	46.51	1111	1112	0	1
c1_11791_chr04	47.03	1212	2112	2	2
c2_26790_chr04	47.84	2111	1111	1	0
c2_26773_chr04	47.84	2111	1111	1	0
c2_53779_chr04	47.85	2111	1111	1	0
c2_44601_chr04	47.85	2111	1111	1	0
c1_15603_chr04	48.23	2112	1221	2	2
c1_6036_chr04	48.55	1211	2211	1	2
c2_31403_chr04	49.33	2211	1112	2	1
c2_21595_chr04	49.54	2111	2111	1	1
c1_16258_chr04	51.05	2211	1122	2	2
c2_38729_chr04	52.18	2111	1111	1	0
c1_3310_chr04	52.33	1211	1111	1	0
c2_10449_chr04	52.35	1212	1121	2	1
c2_10437_chr04	52.56	1212	1112	2	1
c1_11132_chr04	52.81	2211	2111	2	1
c2_10442_chr04	52.84	1212	1112	2	2
c2_39962_chr04	53.42	2111	2211	2	2
c2_32904_chr04	53.49	1211	2111	1	1
c2_47106_chr04	53.53	1212	2112	2	1
c1_14039	53.55	1212	2112	2	1
c2_56253_chr04	53.59	1211	2111	1	1
c2_32900_chr04	53.59	1212	2112	2	1
c1_9111_chr04	53.6	1212	2112	2	1
c2_29476_chr04	53.61	1212	2112	2	1
c1_8368_chr04	53.65	1211	1111	1	0
c2_54533_chr04	53.88	1112	1121	2	1
c2_56257_chr04	53.88	1212	2111	2	1
c2_10020_chr04	53.88	2111	1111	1	0
c2_37323_chr04	53.88	2111	1211	1	1
c2_53782	54.32	1111	2111	0	1
c2_10452_chr04	54.46	2111	1111	1	0
c1_3443_chr04	54.48	2111	1111	1	0
c2_11463_chr04	61.51	2111	1112	1	1
c2_26842_chr04	62.47	1211	1111	1	0
c1_6040_chr04	63.78	2111	1111	1	0
c1_3707_chr04	64.91	1122	1121	2	1
c1_16079	65	1211	2111	1	1
c1_3740_chr04	65.03	1211	2111	1	1
c2_51637	66.87	1111	2111	0	1
c1_16080	68.79	2111	1121	1	1
c1_3722_chr04	70.45	1111	1121	0	1
c2_21839_chr04	70.99	1111	1121	0	1
c2_21893_chr04	71.03	1111	2111	0	1
c2_54229_chr04	72.75	1211	2112	1	1
c2_21934_chr04	72.94	2111	2121	1	2
c2_31713_chr04	73.34	1211	1111	1	0
c2_31734_chr04	74.71	2111	1111	1	0
c2_46643_chr04	76.87	1121	2122	1	3
c2_39287_chr04	78.48	1111	1121	0	1
c1_7567	78.52	1111	1221	0	2
c2_39322_chr04	78.6	1111	1112	0	1
c2_23513_chr04	80.43	1111	1121	0	1
c2_29825_chr04	82.88	2111	1111	1	0
Crh_5
c1_1216_chr05	0	1211	1111
c2_8290_chr05	7.72	1211	1111
c1_1163_chr05	8.15	1121	2122
c2_8522_chr05	8.98	1112	1111
c2_8460_chr05	11.91	1111	1121
c2_8517_chr05	11.97	1111	1121
c1_1074_chr05	13.65	1111	2111
c2_42461_chr05	13.77	1112	1111
c2_10378_chr05	14.69	2212	2111
c2_8295_chr05	14.97	1111	2111
c2_55240_chr05	15.26	2211	2211
c2_54368_chr05	16.3	2111	1111
c2_8278_chr05	16.61	2111	1211
c2_8431_chr05	16.95	1121	1122
c2_46941_chr05	17.59	1211	2112
c2_3512_chr05	18.52	1112	2112
c2_54365_chr05	19.05	2111	1121
c2_10381_chr05	19.48	2111	2211
c2_8254_chr05	20.4	1121	1211
c2_42382_chr05	20.57	1111	1221
c1_3393_chr05	21.27	1111	2111
c2_10411_chr05	21.27	1111	2111
c2_49128_chr05	22.33	1211	2111
c2_50841_chr05	22.48	1211	1111
c2_50840_chr05	22.48	1211	1111
c2_50838_chr05	22.48	1211	1111
c2_5154_chr05	33.18	1111	2111
c2_47398_chr05	37.1	1121	2212
c2_43931_chr05	38.65	1111	1211
c2_49477_chr05	39.34	1221	1111
c2_5212_chr05	39.42	1121	1111
c2_52042_chr05	39.93	1111	1112
c2_53218_chr05	40.54	2112	1111
c1_14400	40.59	1212	1121
c2_56407_chr05	40.59	2112	1121
c2_53296_chr05	40.62	2121	1112
c2_48723	41.9	1111	2111
c2_44034_chr05	41.94	2111	2121
c2_50455_chr05	42.05	1111	2111
c2_53298_chr05	42.06	1211	1111
c2_53223_chr05	42.06	1111	2111
c2_38252_chr05	42.1	1111	2111
c2_57189_chr05	42.1	1111	2111
c1_14600_chr05	42.12	1111	2111
c2_38256_chr05	42.12	1111	2111
c2_54741_chr05	42.28	2111	2121
c2_52043_chr05	42.57	1211	1222
c2_56464_chr05	43.75	2111	2111
c1_15249_chr05	44.3	1111	2111
c2_49278_chr05	46.31	1111	2111
c2_24381_chr05	47.58	1111	2111
c2_32854_chr05	49.8	1111	2111
c2_52067_chr05	50.4	1111	1211
c2_33520_chr05	51.3	1111	1121
c2_33537_chr05	51.5	1111	1121
c1_14127_chr05	51.67	1112	1111
c2_47643_chr05	51.68	1112	1111
c2_43504_chr05	52.59	1111	2111
c2_38171_chr05	52.72	1112	1111
c2_38140_chr05	54	1122	1111
c2_54933	55.42	1211	1211
c2_47647_chr05	55.46	2111	1111
c2_38167_chr05	55.52	2111	1111
c2_47611_chr05	55.7	2121	1111
c2_47646_chr05	56.22	1222	1211
c2_50301_chr05	57.15	1122	2211
c2_11801_chr05	57.16	2111	1111
c2_50299_chr05	57.23	2111	1111
c2_23055_chr05	57.24	2111	1111
c2_50288_chr05	57.24	2111	1111
c1_14801_chr05	57.28	2111	1111
c2_11802_chr05	58.31	2111	1111
c1_3803_chr05	58.33	1111	1121
c2_12042_chr05	59.54	1111	1121
c2_12070_chr05	59.54	2111	1111
c2_11772_chr05	59.69	2111	1111
c2_11822_chr05	62.16	1211	1111
c2_33513_chr05	63.97	1211	2122
c2_33512_chr05	65.35	2111	1111
c2_33517_chr05	65.36	2111	1111
c2_23836_chr05	66.71	2111	1111
c2_11969_chr05	67.03	2121	1111
c2_23828_chr05	67.07	2111	2111
c2_23804_chr05	68.59	1111	1211
c2_23740_chr05	69.88	2211	1211
c1_7622_chr05	69.97	1211	1112
c2_12009_chr05	70.44	1111	1211
c2_11984_chr05	70.45	1111	1211
c2_11949_chr05	70.47	1111	1211
c2_33518_chr05	70.96	1212	1111
Crh_6
c2_30604_chr06	0	1111	1121	0	1
c2_36454_chr06	0.13	2111	1221	1	2
c2_30587_chr06	1.2	1111	1112	0	1
c2_53250_chr06	1.76	1111	1112	0	1
c2_30596_chr06	2.05	2111	1211	1	1
c2_30534_chr06	4.7	1111	1121	0	1
c2_27620_chr06	7.87	1221	1112	2	1
c2_27588_chr06	10.51	2111	2111	1	1
c2_27587_chr06	10.51	1221	1212	2	2
c2_27563_chr06	12.31	1221	1112	2	1
c2_3146	17.71	1221	1112	2	1
c2_35592_chr06	18.73	1111	1211	0	1
c2_3155	20.65	2111	1111	1	0
c2_47002_chr06	21.52	2112	2121	2	2
c2_11313_chr06	22.51	2111	2111	1	1
c2_24047_chr06	22.83	1111	1121	0	1
c2_24052_chr06	22.94	2111	2111	1	1
c2_55661_chr06	22.94	2112	2111	2	1
c2_32894_chr06	23.06	2111	2111	1	1
c2_4594_chr06	23.45	2112	1121	2	1
c2_11316_chr06	23.48	2111	1121	1	1
c2_46998_chr06	23.8	2112	1211	2	1
c2_35590_chr06	23.81	2211	2211	2	2
c2_26498_chr06	24.03	2112	1111	2	0
c2_46995_chr06	24.78	2111	1111	1	0
c2_11309_chr06	24.98	1112	1121	1	1
c2_50188	25	2111	1111	1	0
c2_11314_chr06	25	2111	1111	1	0
c2_50186	25	2111	1111	1	0
c1_10935	25.11	2111	1111	1	0
c2_50199	25.21	2111	1111	1	0
c2_50179	25.23	2111	1111	1	0
c2_50182	25.25	2111	1111	1	0
c1_16656	25.35	2111	1111	1	0
c2_34002	25.54	2112	2111	2	1
c2_57226_chr06	25.78	1222	1121	3	1
c2_51756_chr06	26.14	1121	1121	1	1
c2_46994_chr06	26.48	1211	1111	1	0
c2_50221_chr06	26.75	2112	1111	2	0
c1_14778	26.91	2112	1211	2	1
c2_36590_chr06	27.17	1211	1111	1	0
c2_24322_chr06	27.28	1211	1121	1	1
c2_32917_chr06	27.77	1211	2212	1	3
c1_12409_chr06	27.93	1121	2111	1	1
c2_43056_chr06	28.65	1111	2111	0	1
c2_51758_chr06	28.68	1111	2111	0	1
c2_43093_chr06	28.83	1121	1121	1	1
c2_42346_chr06	29.19	2112	1121	2	1
c2_50220_chr06	29.34	2122	1121	3	1
c2_42347_chr06	32.33	2111	1211	1	1
c2_33324_chr06	32.51	1221	2211	2	2
c2_56055_chr06	34.09	1211	1112	1	1
c1_13422_chr06	34.77	2111	1111	1	0
c2_42355_chr06	35.23	2111	1111	1	0
c2_51757_chr06	36.5	2111	1111	1	0
c2_33372_chr06	36.53	2111	1111	1	0
c2_51770_chr06	36.76	2111	1111	1	0
c2_40239_chr06	37.13	2111	2111	1	1
c2_37767_chr06	37.21	2111	1221	1	2
c2_40242_chr06	38.11	2111	1121	1	1
c1_11276_chr06	38.71	2111	1111	1	0
c2_49889_chr06	39.01	1211	1211	1	1
c1_11277_chr06	39.39	1111	2111	0	1
c2_57412_chr06	40.07	1111	1211	0	1
c2_49885_chr06	40.7	1111	1211	0	1
c2_37770_chr06	40.83	1221	1212	2	2
c1_16470_chr06	42.97	2112	1211	2	1
c2_57018_chr06	43.27	1222	1211	3	1
c1_8131_chr06	46	2211	1221	2	2
c2_54061_chr06	48.58	1211	1111	1	0
c1_2065_chr06	49.33	1112	2111	1	1
c2_16778_chr06	49.49	1221	2111	2	1
c1_8133_chr06	49.7	2111	1121	1	1
c2_54194_chr06	49.88	2111	1121	1	1
c2_16767_chr06	50.56	1222	1121	3	1
c2_31156_chr06	51.03	1112	1111	1	0
c2_16777_chr06	53.04	1111	1121	0	1
c2_33866_chr06	54.07	1122	1111	2	0
c2_16798_chr06	54.55	1122	2121	2	2
c2_5759_chr06	54.91	1111	2111	0	1
c2_16799_chr06	55.05	2211	1211	2	1
c1_15368_chr06	55.36	1221	1122	2	2
c2_8791_chr06	55.72	1211	1111	1	0
c2_31180_chr06	55.9	2112	2111	2	1
c2_33892_chr06	56.17	1212	1111	2	0
c2_50586_chr06	56.48	1111	1121	0	1
c2_31144_chr06	56.75	1111	1121	0	1
c1_6997_chr06	59.93	1211	1111	1	0
c1_7029_chr06	61.15	2111	1121	1	1
c2_56141_chr06	61.43	2111	1211	1	1
c2_9255_chr06	61.9	1111	1211	0	1
c1_2978_chr06	62.49	1211	1111	1	0
c2_9083_chr06	62.59	2211	1122	2	2
c2_22298_chr06	62.68	1111	1211	0	1
c2_24155_chr06	62.7	2111	1211	1	1
c1_7044_chr06	63.28	2111	1221	1	2
c1_3011_chr06	63.43	1212	1111	2	0
c2_8927_chr06	63.46	2112	1121	2	1
c2_50800_chr06	63.82	1111	1211	0	1
c1_3098_chr06	64.03	1111	1211	0	1
c1_7041_chr06	64.17	2112	1221	2	2
c1_7040_chr06	64.2	2112	1221	2	2
c2_9201_chr06	65.42	1111	2111	0	1
c1_2944_chr06	65.52	1211	1111	1	0
c2_8662_chr06	65.54	1211	1111	1	0
c2_9043_chr06	65.64	1122	2111	2	1
c2_29216_chr06	67.14	1111	2121	0	2
c2_28107_chr06	67.77	1122	1212	2	2
c2_41237_chr06	70.64	1112	2121	1	2
c2_29162_chr06	70.82	2111	1211	1	1
c1_3130_chr06	71.06	1211	1111	1	0
c2_37349	73.44	1111	1211	0	1
c2_9189_chr06	76.15	1111	1121	0	1
Crh_7
c2_28854_chr07	0	2111	1111	1	0
c2_12596_chr07	15.04	2111	1111	1	0
c2_12595_chr07	15.05	2111	1111	1	0
c1_4065_chr07	15.16	2111	1111	1	0
c2_51534_chr07	15.25	2111	1111	1	0
c2_28310_chr07	19.7	2111	1111	1	0
c1_9206_chr07	21.03	1122	1211	2	1
c2_28290_chr07	22.75	1212	1111	2	0
c2_28214_chr07	24.48	2121	2112	2	2
c1_9208_chr07	24.8	2122	1121	3	1
c2_19899_chr07	27.94	2111	1111	1	0
c2_19804_chr07	36.8	1111	2111	0	1
c2_46329	36.95	2111	2111	1	1
c1_10461_chr07	37.47	1211	1221	1	2
c2_18655_chr07	38.49	1111	1211	0	1
c2_19787_chr07	39.35	1211	1121	1	1
c2_45453_chr07	40.59	1111	1221	0	2
c2_19826_chr07	42.18	1211	1211	1	1
c2_46322_chr07	42.58	1211	1111	1	0
c1_13378_chr07	43.03	2211	1121	2	1
c2_25258_chr07	43.63	1111	1121	0	1
c2_25257_chr07	43.65	1111	1121	0	1
c1_13482_chr07	44.06	1111	1122	0	2
c2_25207	44.4	2211	2111	2	1
c2_26015_chr07	44.73	1111	1211	0	1
c2_25212_chr07	44.92	1122	1211	2	1
c1_11485_chr07	45.9	1111	2111	0	1
c1_7405_chr07	46.74	1111	2111	0	1
c2_23396_chr07	49.1	2112	2111	2	1
c1_5137_chr07	49.36	2111	1111	1	0
c2_33493_chr07	49.41	1211	1111	1	0
c1_10031_chr07	49.57	2111	2121	1	2
c2_15925_chr07	49.61	1121	1112	1	1
c1_16195_chr07	49.83	2111	1111	1	0
c2_6622_chr07	54.85	1111	2111	0	1
c1_3154_chr07	55.17	1111	2111	0	1
c2_57050_chr07	55.69	1211	1211	1	1
c2_9375_chr07	56.02	1211	1111	1	0
c2_1980_chr07	56.03	1211	1111	1	0
c1_7521_chr07	56.04	1211	1111	1	0
c2_9362_chr07	56.07	1211	2111	1	1
c2_4545_chr07	56.09	2111	1121	1	1
c1_3159_chr07	56.12	1211	1111	1	0
c2_4543_chr07	56.3	1211	2211	1	2
c1_1547_chr07	56.33	1211	2211	1	2
c2_4540_chr07	56.34	1211	2211	1	2
c2_4473_chr07	56.5	2211	2111	2	1
c1_15203_chr07	57.73	1121	1112	1	1
c2_9377_chr07	58.03	2121	1112	2	1
c1_3142_chr07	59.07	2121	1112	2	1
c2_31376_chr07	59.22	2121	1112	2	1
c1_15700_chr07	59.38	2111	1111	1	0
c2_52104_chr07	60.32	2111	2121	1	2
c1_16450_chr07	60.37	2121	1112	2	1
c2_6601_chr07	60.52	2121	1112	2	1
c2_52110_chr07	61.45	2121	1112	2	1
c2_7735_chr07	61.68	2111	1111	1	0
c1_2790_chr07	61.77	2111	1111	1	0
c1_13594_chr07	62.18	2111	1111	1	0
c1_10848_chr07	62.43	2111	1111	1	0
c2_29365_chr07	65.2	1121	1112	1	1
c1_16201	65.25	1111	1121	0	1
c2_46708_chr07	65.3	1121	1112	1	1
c2_48715	66.71	1212	1121	2	1
c1_16222_chr07	67.17	1211	1111	1	0
c2_46715_chr07	67.93	1212	1121	2	1
c2_36872_chr07	68.08	1211	1211	1	1
c1_11935_chr07	68.17	1122	1121	2	1
c2_41666_chr07	68.34	1111	1211	0	1
c2_41676_chr07	68.37	1111	1211	0	1
c2_36859_chr07	68.6	1211	1211	1	1
c2_55830_chr07	68.67	1211	2212	1	3
c2_52663_chr07	68.82	1122	2111	2	1
c2_55832_chr07	68.87	2212	2111	3	1
c2_46379_chr07	69.01	2112	2111	2	1
c2_36111_chr07	69.33	1111	1211	0	1
c2_26210_chr07	69.93	1221	1212	2	2
c2_36832_chr07	70	2211	2111	2	1
c1_10975_chr07	70.29	1221	1122	2	2
c2_26211_chr07	70.67	2112	2121	2	2
c2_38871_chr07	70.79	1111	1211	0	1
c1_8186_chr07	71.01	2112	2111	2	1
c1_13658_chr07	72.67	1111	1211	0	1
c1_16212_chr07	74.82	1111	1121	0	1
c2_26162_chr07	74.85	2112	2111	2	1
c1_15909_chr07	81.81	1121	1112	1	1
c1_13663_chr07	83.3	2111	1112	1	1
c2_41690_chr07	83.8	2211	2111	2	1
c1_13671_chr07	84.28	1211	1212	1	2
c1_11525_chr07	89.81	2111	1111	1	0
c2_38893_chr07	91.09	2111	1111	1	0
Chr_8
c2_53516_chr08	0	2111	1111	1	0
c2_30053_chr08	3.42	2211	2211	2	2
c2_12748_chr08	7.72	1111	1112	0	1
c1_14165_chr08	10.31	2111	2211	2	2
c1_14166_chr08	12.16	1111	1211	0	1
c2_52856_chr08	12.22	2122	2111	3	1
c2_2183_chr08	12.47	1111	1121	0	1
c2_47906_chr08	13.64	2121	2111	2	1
c2_34564_chr08	14.65	2121	1111	2	0
c1_14542_chr08	14.82	1111	1112	0	1
c2_41463_chr08	14.94	1111	1112	0	1
c2_2832_chr08	15.54	1111	2111	0	1
c2_47925	15.63	1111	2111	0	1
c2_53177	15.64	1111	2111	0	1
c2_33405_chr08	16.09	1111	2111	0	1
c1_13586_chr08	16.85	1121	1111	1	0
c2_2757_chr08	18.12	2111	2111	1	1
c2_26938_chr08	18.48	1111	2111	0	1
c1_12162_chr08	18.5	1111	2111	0	1
c1_12161_chr08	19.83	1111	2111	0	1
c2_2754_chr08	21.12	1211	1112	1	1
c2_2747_chr08	21.91	1211	1111	1	0
c2_32322_chr08	21.95	1211	1111	1	0
c2_2748_chr08	21.97	1211	1111	1	0
c2_51329_chr08	21.98	1211	1111	1	0
c2_44331_chr08	22.01	1121	1121	1	1
c1_15044_chr08	23.08	2211	1122	2	2
c1_15048_chr08	23.08	2211	1212	2	2
c1_15045_chr08	24.14	1211	1111	1	0
c1_13043_chr08	24.14	1211	1111	1	0
c2_44307_chr08	24.24	1211	1111	1	0
c2_34109_chr08	26.38	1121	1111	1	0
c2_34110_chr08	26.41	1121	1111	1	0
c2_18945_chr08	27.82	2112	1212	2	2
c2_32288	28.1	2111	2111	1	1
c2_33381_chr08	30.07	2211	1111	2	0
c2_15859_chr08	31.1	2111	1111	1	0
c2_50151_chr08	31.18	2111	1111	1	0
c2_15796_chr08	31.19	2111	1111	1	0
c1_14763_chr08	31.19	2111	1111	1	0
c1_15756_chr08	31.49	2111	2111	1	1
c2_51051_chr08	32.52	2111	1111	1	0
c2_15840_chr08	33.27	1112	1111	1	0
c2_15818_chr08	34.19	2111	2111	1	1
c2_40294_chr08	34.45	2111	1111	1	0
c1_15416_chr08	36.17	1122	1211	2	1
c2_28610_chr08	37.13	1112	1111	1	0
c2_15847_chr08	37.16	1122	1112	2	1
c1_8774_chr08	38.04	2111	2111	1	1
c2_49337_chr08	38.43	2111	1111	1	0
c2_40290_chr08	38.72	2111	2111	1	1
c2_34758_chr08	39.38	2111	2111	1	1
c2_28641_chr08	39.57	2111	2111	1	1
c2_28634_chr08	39.76	1112	1121	1	1
c2_53886	40.5	1122	1112	2	1
c1_8778_chr08	40.52	1122	1112	2	1
c1_13116_chr08	42.37	1211	1112	1	1
c2_28562_chr08	42.56	1211	1112	1	1
c2_44472_chr08	42.62	1211	1112	1	1
c2_44529_chr08	42.7	1121	1121	1	1
c2_28632_chr08	42.87	1211	1112	1	1
c2_36781_chr08	43.22	1122	1121	2	1
c2_52021_chr08	43.61	1111	1121	0	1
c2_36741_chr08	44.49	2111	2111	1	1
c2_52700_chr08	45.12	1121	1121	1	1
c2_19144_chr08	45.16	2111	2111	1	1
c2_19085_chr08	46.73	1211	1122	1	2
c2_19020_chr08	47.61	2111	1122	1	2
c2_36731_chr08	48.74	1121	1212	1	2
c1_10384_chr08	50.26	2111	1122	1	2
c2_49602_chr08	50.34	1112	1211	1	1
c2_49365_chr08	51.28	2111	1222	1	3
c2_49598_chr08	51.38	1112	1212	1	2
c2_28580_chr08	52.5	2111	1222	1	3
c1_8282_chr08	54.84	2111	1221	1	2
c2_17113_chr08	55.34	1122	1211	2	1
c2_16993_chr08	57.63	2111	2111	1	1
c1_8235_chr08	58.37	1122	2111	2	1
c2_28467_chr08	61.33	1111	1211	0	1
c1_8758_chr08	61.34	2111	1221	1	2
c1_8760_chr08	61.35	2121	1212	2	2
c2_16135_chr08	61.39	2112	2112	2	2
c1_5179_chr08	61.61	2111	2111	1	1
c2_28475_chr08	62.01	2111	1221	1	2
c1_5587_chr08	62.1	1211	2111	1	1
c2_17061_chr08	62.4	2111	1122	1	2
c2_16068_chr08	63.11	2111	1211	1	1
c2_16998_chr08	63.9	2111	1111	1	0
Chr_9
c2_55479_chr09	0	1111	2111	0	1
c2_2998_chr09	4.68	1111	1211	0	1
c2_40084_chr09	5.87	1111	1211	0	1
c1_8574	7.01	2111	1111	1	0
c2_43241_chr09	7.86	1111	2111	0	1
c2_22094_chr09	15.2	1122	2111	2	1
c2_30008_chr09	19.23	1221	1121	2	1
c2_22054_chr09	20.57	1111	2111	0	1
c1_6534_chr09	21.95	2111	2111	1	1
c2_27003_chr09	23.65	2211	1112	2	1
c2_21992_chr09	24.43	2111	1111	1	0
c2_26979_chr09	24.68	1211	1221	1	2
c1_8415_chr09	25.09	2111	1111	1	0
c1_6928_chr09	25.2	2111	1111	1	0
c2_40879_chr09	25.84	1221	1121	2	1
c2_26948_chr09	29.05	1111	1211	0	1
c2_44828_chr09	32.37	1111	2111	0	1
c1_11907_chr09	33.06	2112	2112	2	2
c2_14639_chr09	33.24	1211	1211	1	1
c2_14640_chr09	33.27	1211	1211	1	1
c2_39499_chr09	36.79	2121	2112	2	2
c2_56979_chr09	36.87	1122	2111	2	1
c1_11779_chr09	37.53	2211	1211	2	1
c1_13515_chr09	37.8	2121	2111	2	1
c2_45570_chr09	41.65	1111	1211	0	1
c2_21332	42.16	1121	1112	1	1
c1_4082_chr09	42.71	1111	1112	0	1
c2_56183_chr09	43.16	1121	1222	1	3
c2_43437_chr09	43.48	2211	1111	2	0
c2_36391_chr06	43.76	1122	1211	2	1
c1_12802_chr09	44.1	2211	1211	2	1
c1_4091_chr09	44.39	1111	1211	0	1
c1_4084_chr09	44.41	1111	1211	0	1
c1_4068_chr09	45.89	2211	2211	2	2
c2_16275_chr09	46.65	1121	1122	1	2
c2_57401_chr09	46.75	1121	1111	1	0
c2_685_chr09	46.76	2212	2111	3	1
c1_6476_chr09	46.95	2111	2212	1	3
c2_58249_chr09	47.03	2212	2111	3	1
c2_1485_chr09	47.05	2212	2111	3	1
c2_562_chr09	47.1	2212	2111	3	1
c2_1915_chr09	47.1	1121	1222	1	3
c2_21317	47.27	1221	2111	2	1
c2_31383_chr09	47.34	2211	2111	2	1
c2_1511_chr09	47.85	1211	2111	1	1
c2_1514_chr09	47.99	1211	2111	1	1
c2_6333_chr09	48	1211	2111	1	1
c2_22763_chr09	48.2	2111	1111	1	0
c2_4200_chr09	48.47	1211	2111	1	1
c1_8212_chr09	48.49	1211	2111	1	1
c2_700	48.54	1211	2111	1	1
c2_23439_chr09	48.9	2211	2111	2	1
c2_4381	48.96	2111	2111	1	1
c2_33625	48.99	2111	2112	1	1
c2_4396	49.19	2111	2112	1	1
c1_9490_chr09	49.3	2211	2112	2	2
c1_4103_chr09	49.39	2121	2112	2	2
c2_58234_chr09	49.85	1221	1211	2	1
c2_33627	49.88	1122	1221	2	2
c2_12785_chr09	50.22	1211	1111	1	0
c2_45881	50.65	1211	1111	1	0
c2_4385	50.76	1111	1211	0	1
c1_1512_chr09	52.22	1111	2111	0	1
c2_49770_chr09	52.77	2111	2111	1	1
c1_15470_chr09	53.38	1211	2211	1	2
c2_13133_chr09	54.82	1111	2111	0	1
c1_4238_chr09	56.95	1111	2111	0	1
c2_35374_chr09	57.06	1221	1121	2	1
c2_35470_chr09	57.75	1121	1121	1	1
c2_3943_chr09	59.33	1211	2211	1	2
c2_3949_chr09	59.33	1211	2211	1	2
c1_1395_chr09	60.49	1111	1212	0	2
c2_4158_chr09	61.39	2121	2111	2	1
c2_13322_chr09	61.47	1212	1221	2	2
c2_13194_chr09	61.68	1121	2112	1	2
c2_4030_chr09	62.12	2111	2112	1	1
c2_3997_chr09	62.93	1211	1111	1	0
c1_4237_chr09	62.96	1212	1221	2	2
c1_1352_chr09	63.98	1211	1111	1	0
c1_1415_chr09	64.52	2121	2111	2	1
c2_4187_chr09	65.89	1111	2111	0	1
c2_4165_chr09	66.04	2121	2211	2	2
c2_39227_chr09	67.85	1111	1211	0	1
c1_1414_chr09	68.06	1121	1111	1	0
c1_1368_chr09	68.17	1111	2111	0	1
c2_4177_chr09	68.27	1121	1111	1	0
c2_4028_chr09	68.63	1121	2111	1	1
c2_4124_chr09	68.66	1212	1111	2	0
c2_4161_chr09	68.74	1211	1111	1	0
c1_9652_chr09	72.11	1121	1111	1	0
c2_10956_chr09	72.4	2111	1111	1	0
c1_3597_chr09	75.12	1121	2111	1	1
c2_48597_chr09	78.02	1111	1211	0	1
c2_11087_chr09	78.27	1122	2111	2	1
c1_3613_chr09	78.29	1111	2111	0	1
c2_48673_chr09	79.04	2112	2211	2	2
c1_14388_chr09	79.1	2111	1111	1	0
c2_11043_chr09	79.56	2111	1111	1	0
c1_3608_chr09	79.73	2111	1111	1	0
c2_39035_chr09	81.4	1122	1212	2	2
c2_39029_chr09	81.78	2111	2111	1	1
c2_3325_chr09	83.88	2111	1111	1	0
Chr_10
c1_13419_chr10	0	2111	1111	1	0
c1_13420_chr10	0	2111	1111	1	0
c2_45023_chr10	0.38	2111	2111	1	1
c2_22626_chr10	0.41	1111	1121	0	1
c2_44199_chr10	1.06	2111	1111	1	0
c2_48984_chr10	1.1	2111	1111	1	0
c1_14480_chr10	1.67	2111	2111	1	1
c2_29788_chr10	2.16	2111	1111	1	0
c1_12986_chr10	2.17	2111	1111	1	0
c2_29787_chr10	2.17	2111	1111	1	0
c2_29796_chr10	2.65	2111	1111	1	0
c2_29806_chr10	3.11	2111	1111	1	0
c2_22591_chr10	3.23	2111	2111	1	1
c1_7148_chr10	3.28	2111	2111	1	1
c1_12656_chr10	3.53	2211	2111	2	1
c2_22559_chr10	3.63	2111	2111	1	1
c1_8801_chr10	3.9	2211	2211	2	2
c2_15483_chr10	4.19	1121	1122	1	2
c2_28666_chr10	4.35	2211	1211	2	1
c2_22624_chr10	4.82	2112	2211	2	2
c2_41768_chr10	5.06	2121	2211	2	2
c2_48098_chr10	5.21	1121	1121	1	1
c2_15470_chr10	5.29	1211	1121	1	1
c2_45256_chr10	5.6	1121	2121	1	2
c2_22564_chr10	5.81	2211	1211	2	1
c1_12999_chr10	5.81	1121	2121	1	2
c1_5001_chr10	6.01	2211	2111	2	1
c1_12655_chr10	6.25	1121	2121	1	2
c2_49017_chr10	6.42	1121	1121	1	1
c1_13243_chr10	6.53	1211	1121	1	1
c2_34332_chr10	6.59	2112	2211	2	2
c2_24768_chr10	6.69	2211	2111	2	1
c2_22664_chr10	6.74	1211	1121	1	1
c1_10349_chr10	6.94	2211	2211	2	2
c2_48128_chr10	8.24	1211	1221	2	2
c2_49010_chr10	9.14	2121	2112	2	2
c1_5044_chr10	9.3	1211	1111	1	0
c2_48124_chr10	9.48	1111	2111	0	1
c2_48138_chr10	9.48	1111	2111	0	1
c2_28756_chr10	9.58	1212	1221	2	2
c2_48107_chr10	10.02	2121	1112	2	1
c2_29767_chr10	10.28	2121	1112	2	1
c1_9027_chr10	10.29	2111	1211	1	1
c2_15607_chr10	11.41	2121	1212	2	2
c2_15547_chr10	12.24	1212	1121	2	1
c2_51215_chr10	12.85	1121	2121	1	2
c2_45235_chr10	13.5	1111	1211	0	1
c1_13416_chr10	13.71	1111	1211	0	1
c2_51213_chr10	14.59	2111	1111	1	0
c2_15585_chr10	14.98	1211	2111	1	1
c2_51202_chr10	15	2111	1111	1	0
c2_28786_chr10	18.01	1111	2211	0	2
c2_27806_chr10	19.39	2111	1111	1	0
c2_25485_chr10	20.15	1212	1122	2	2
c2_45603_chr10	25.31	2211	2211	2	2
c2_53064_chr10	26.01	2111	1121	1	1
c2_41394	30.32	1121	1121	1	1
c2_41395	32.55	1112	1211	1	1
c2_41393	32.72	1112	2111	1	1
c2_34553_chr10	35.99	1121	1111	1	0
c2_40833_chr10	37.05	1221	1122	2	2
c2_11679_chr10	37.06	1122	1122	2	2
c1_1_chr10	40.89	1111	2111	0	1
c2_37_chr10	40.96	1111	1121	0	1
c1_6070_chr10	41.67	1211	1111	1	0
c2_38277_chr10	42.67	1211	1111	1	0
c2_57273_chr10	43.72	1211	1211	1	1
c1_5_chr10	43.89	1211	1111	1	0
c2_52794_chr10	43.89	1211	1111	1	0
c1_7_chr10	44.22	2211	1211	2	1
c2_1905_chr10	44.98	2211	1111	2	0
c1_14053_chr10	46.6	1121	1111	1	0
c1_14045_chr10	46.6	1121	1111	1	0
c2_19224_chr10	46.85	2121	2111	2	1
c2_19222_chr10	46.85	2121	2111	2	1
c2_919_chr10	49.12	1111	1121	0	1
c1_329_chr10	51.19	1121	1212	1	2
c2_944_chr10	55.39	1111	2111	0	1
c2_24746_chr10	56.96	1111	2111	0	1
c2_24745_chr10	57.29	2112	1122	2	2
c2_24717_chr10	57.76	1111	2111	0	1
c2_24747_chr10	58.26	2111	1211	1	1
c1_13006_chr10	58.6	2121	2112	2	2
c2_24739_chr10	59.04	1221	2111	2	1
c1_7803_chr10	59.06	1222	1121	3	1
c1_7801_chr10	59.35	1111	1211	0	1
c1_289_chr10	62.17	1122	1122	2	2
c2_826_chr10	62.29	1111	1211	0	1
c2_1209_chr10	62.32	1121	1221	1	2
c2_1108_chr10	66.91	1211	1211	2	1
c1_357_chr10	74.68	1211	1121	2	1
c2_51640	75.1	1122	1122	1	2
c2_19429	75.1	1111	1121	0	1
c2_47920	75.93	1111	2111	0	1
c2_37599	75.93	1111	2111	0	1
c2_36953	77.1	1121	1111	1	0
c1_11013	77.13	1121	1111	1	0
c2_1296_chr10	87	1211	1111	1	0
c1_8601_chr10	96.51	1111	2111	0	1
Chr_11
c2_34188_chr11	0	1211	1212
c2_34193_chr11	1.04	2111	1111
c2_34204_chr11	4.39	1111	1211
c1_10269_chr11	5.63	1211	1111
c2_22132_chr11	6.42	1111	2111
c2_22130_chr11	6.77	1111	2111
c2_30306_chr11	7.05	2111	1221
c2_30302_chr11	7.46	2111	1211
c2_3739_chr11	8.89	1212	2111
c2_15330_chr11	9.29	2111	1221
c1_4949_chr11	9.4	1122	1212
c2_15255_chr11	9.54	1211	2112
c2_31553_chr11	9.61	2111	1121
c2_39960_chr11	10.86	1211	1111
c1_11826_chr11	10.87	2122	1121
c2_39912_chr11	10.87	1211	1111
c2_39890_chr11	10.88	1211	1111
c2_15333_chr11	11.73	2111	1121
c2_15291_chr11	11.92	2111	1111
c1_4947_chr11	13.14	1111	1211
c2_15387_chr11	13.28	2111	1111
c2_15340_chr11	13.59	2111	1121
c2_15337_chr11	13.89	2111	1121
c2_22165_chr11	14.17	1211	2112
c2_22183_chr11	16.41	2111	1111
c1_15870_chr11	17.73	2211	1112
c2_3738_chr11	20.25	1111	1211
c2_52872	21.17	2122	1121
c2_51544	21.37	1122	1121
c2_51548	22.19	2111	1211
c2_54586_chr11	22.71	2111	2121
c2_3691_chr11	23.01	1111	1211
c2_3685_chr11	23.04	1111	1211
c2_45208_chr11	24.44	1122	1211
c2_13640_chr11	25.13	1122	2121
c2_45205_chr11	25.29	1122	1111
c2_13613_chr11	26.21	2111	2121
c2_13620_chr11	27.04	1122	1111
c2_4222_chr11	27.26	1111	1121
c2_18249_chr11	27.26	1111	1121
c1_11237	27.3	1111	1121
c2_31443_chr11	27.38	2112	1121
c2_55959_chr11	27.75	1211	1211
c2_30361_chr11	27.83	1211	2212
c2_13621_chr11	28.82	2111	1111
c1_4371_chr11	28.89	2111	1111
c2_36589_chr11	29.13	2112	1121
c2_19461_chr11	29.65	1111	2111
c1_16141_chr11	29.78	2122	2111
c2_50977_chr11	30.19	1111	2111
c1_15554_chr11	32.35	1211	1111
c1_5716_chr11	32.82	1122	2121
c2_56322_chr11	32.88	2111	1211
c2_50338_chr11	33.63	2111	1122
c2_53272_chr11	34.43	1121	1121
c1_15659_chr11	34.77	1121	1111
c2_29097_chr11	34.82	2111	1211
c2_49311_chr11	39.04	2111	1221
c2_31442_chr11	39.49	1211	2212
c2_53682_chr11	39.77	1121	2111
c2_12252_chr11	40.1	2111	1121
c2_32989_chr11	40.11	2211	2112
c2_24318_chr11	40.12	1111	2111
c1_4010_chr11	40.19	2111	1221
c2_56627_chr11	40.24	1111	2111
c1_3992_chr11	40.34	2111	1211
c1_15658_chr11	40.79	1111	2111
c2_32978_chr11	41.54	1111	2111
c2_32975_chr11	42.22	1111	2111
c1_15787_chr11	46.48	1211	2211
c1_4000_chr11	46.66	2211	2112
c2_44871_chr11	47	1112	2112
c2_12333_chr11	48.14	2121	1211
c2_23976_chr11	49.16	1112	1111
c2_35868_chr11	49.37	2111	1212
c2_21071	52.47	1121	1111
c2_21072	52.47	1121	1111
c1_7668_chr11	52.9	2112	1121
c2_21041_chr11	54.73	1121	1111
c2_33712_chr11	54.92	1221	1212
c1_2299_chr11	55.65	1111	2112
c2_6235_chr11	56.41	2211	2111
c2_55972_chr11	56.6	1112	1211
c1_2221_chr11	56.64	2112	1211
c2_5974_chr11	57.9	2211	2211
c2_37660_chr11	58.27	1111	1112
c1_2280_chr11	58.31	2111	1212
c2_6293_chr11	58.59	1211	2112
c2_6301_chr11	58.77	1112	2112
c2_55976_chr11	59.02	2211	1221
c2_6167_chr11	59.91	1111	1121
c1_2228_chr11	60.6	1111	1211
c1_4319_chr11	62.73	1212	2211
c1_4322_chr11	62.74	1221	2211
c2_33635_chr11	62.95	1121	2111
c2_37233_chr11	63.34	1211	1212
c2_13419_chr11	63.97	1212	2112
c2_13350_chr11	66.72	1211	2112
c2_13345_chr11	66.74	1121	1211
Chr_12
c2_5713_chr12	0	1111	2111	0	1
c2_50875_chr12	3.96	1111	2111	0	1
c2_5730_chr12	13.36	2111	1211	1	1
c2_6454_chr12	13.52	1111	2111	0	1
c2_6475_chr12	13.82	1111	1221	0	2
c2_6445_chr12	16.36	1111	1211	0	1
c1_2353_chr12	17.64	1111	1121	0	1
c2_32084_chr12	17.89	1111	2111	0	1
c2_32082_chr12	17.92	1111	2111	0	1
c2_32072_chr12	19.47	1121	2111	1	1
c2_5463_chr12	19.6	2112	1211	2	1
c2_6472_chr12	23.89	2111	1111	1	0
c2_23250_chr12	25.59	2111	1111	1	0
c2_51711_chr12	26.21	2121	1111	2	0
c1_1923_chr12	27.85	1121	2111	1	1
c2_6402_chr12	28.05	2121	1111	2	0
c1_14869_chr12	28.62	2112	1111	2	0
c2_32482_chr12	29.85	1211	1121	1	1
c2_32539_chr12	30.13	1211	2111	1	1
c2_23308_chr12	30.32	1211	2111	1	1
c2_43899_chr12	32.06	2111	1111	1	0
c2_23256_chr12	32.72	2112	1122	2	2
c2_18842_chr12	36.98	2211	1122	2	1
c2_43910_chr12	38.32	1111	1211	0	1
c2_18825_chr12	38.86	1121	1211	1	1
c2_45811_chr12	40.33	2111	1111	1	0
c2_45816_chr12	40.38	2111	1111	1	0
c1_14577_chr12	41.59	2111	1112	1	1
c2_48012_chr12	41.61	2212	1112	3	1
c2_10085_chr12	43.07	1211	1111	1	0
c2_17612_chr12	43.38	1111	2111	0	1
c1_10050_chr12	43.65	1111	1211	0	1
c1_8914_chr12	44.4	1111	1211	0	1
c2_32114_chr12	44.5	1211	1111	1	0
c1_3172_chr12	45.42	1111	2111	0	1
c2_27922_chr12	45.86	1111	2111	0	1
c1_16443_chr12	47.13	2111	1111	1	0
c1_3321_chr12	47.36	1111	1211	0	1
c2_17623_chr12	47.77	2121	1221	2	2
c2_34800_chr12	48.79	2111	2112	1	2
c2_38047_chr12	50.49	2121	1122	2	2
c2_31414_chr12	50.71	1121	2111	1	1
c2_38068_chr12	51.58	2111	1212	1	2
c2_32189_chr12	51.98	2211	2111	2	1
c2_32120_chr12	52.47	1112	2111	1	1
c1_5459_chr12	52.57	1212	2112	2	2
c2_3259_chr12	52.79	2111	1111	1	0
c2_3251_chr12	54.49	1211	1111	1	0
c2_3258_chr12	54.5	1211	1111	1	0
c2_53245_chr12	54.54	1211	1111	1	0
c2_48912_chr12	55.06	1211	2111	1	1
c2_34780_chr12	56.85	1112	1111	1	0
c2_34789_chr12	58.87	1121	2111	1	1
c2_49209_chr12	59.49	2111	1111	1	0
c2_49206_chr12	59.49	2111	1111	1	0
c2_49203_chr12	59.49	2111	1111	1	0
c2_46314_chr12	60.58	2111	1111	1	0
c2_27970_chr12	60.97	2111	1111	1	0
c2_27962_chr12	60.98	2111	1111	1	0
c2_55017_chr12	61.98	2111	1111	1	0
c2_16200_chr12	62.44	2111	1111	1	0
c2_49201_chr12	65.68	1121	2111	1	1
c2_27929_chr12	67.39	1111	2111	0	1
c2_24650_chr12	68.37	2111	2111	1	1
c2_48899_chr12	71.12	2111	2111	1	1
c2_16204_chr12	72.21	1111	2111	0	1
c2_16217_chr12	73.78	1111	2111	0	1
c2_25310_chr12	74.07	1111	2111	0	1
c2_27960_chr12	75.48	1111	2111	0	1
c2_24565_chr12	80.21	1111	1122	0	2
c2_24561_chr12	80.29	2211	1212	2	2
c2_24535_chr12	80.9	2122	1121	3	1
c2_24556_chr12	82.18	1221	1111	2	0
c2_25331_chr12	87.74	1211	1111	1	0
